# Supplementary material for: Common Hydrogen Bond Interactions in Diverse Phosphoryl Transfer Active Sites
Source: PLoS One. 2014 Sep 19;9(9):e108310. doi: 10.1371/journal.pone.0108310 (PMC4169622; doi:10.1371/journal.pone.0108310)
Supplement: Table S3 — Pairwise t-tests between structure sets, no hydrogens. (XLSX) [file pone.0108310.s004.xlsx]

## Sheet: Table S3
Table S3. Pairwise t-tests between structure sets.
A
Resolution Cutoff: 2.7Å. Interactions between waters and ligands are not included. For non-bridging oxygens, interations are totaled over the two (α, β) or three (γ) oxygens in the group. In parentheses, the number of interactions is normalized by the number of lone pairs.
		Non-bridging oxygens			Bridging oxygens
Structure set	# structures	Mean number of interactions +/ Standard error (Mean/# of lone pairs)
		α	β	γ	O5'	α	β
O3β―Pγ-cleaving sites	155	2.4 ± 0.1 (0.5)	4.2 ± 0.2 (0.8)	4.6 ± 0.2 (0.6)	0.1 ± 0.0 (0.0)	0.3 ± 0.0 (0.1)	0.8 ± 0.1 (0.4)
Pα―O3α-cleaving sites	100	2.7 ± 0.1 (0.5)	3.3 ± 0.1 (0.7)	4.2 ± 0.2 (0.5)	0.1 ± 0.0 (0.1)	0.4 ± 0.1 (0.2)	0.4 ± 0.1 (0.2)
Non-catalytic binding sites	50	2.0 ± 0.2 (0.4)	2.5 ± 0.2 (0.5)	4.1 ± 0.3 (0.5)	0.2 ± 0.1 (0.1)	0.3 ± 0.1 (0.1)	0.5 ± 0.1 (0.3)
p-values from pairwise t-tests
		α	β	γ	O5'	α	β
O3β―Pγ-cleaving sites vs. non-catalytic binding sites		0.08585	6.3e-10	0.06511	0.29875	0.77764	0.00884
Pα―O3α-cleaving sites vs. non-catalytic binding sites		0.01267	0.00754	0.71973	0.55366	0.14776	0.27492
O3β―Pγ-cleaving sites vs. Pα―O3α-cleaving sites		0.24271	3.4e-05	0.06715	0.55366	0.02097	5e-07
B
Resolution Cutoff: 2.0Å. Interactions between waters and ligands are included.
		Non-bridging oxygens			Bridging oxygens
Structure set	# structures	Mean number of interactions +/ Standard error (Mean/# of lone pairs)
		α	β	γ	O5'	α	β
O3β―Pγ-cleaving sites	72	4.2 ± 0.2 (0.8)	5.3 ± 0.2 (1.1)	7.0 ± 0.3 (0.9)	0.1 ± 0.1 (0.1)	0.3 ± 0.1 (0.1)	1.1 ± 0.1 (0.5)
Pα―O3α-cleaving sites	45	4.7 ± 0.2 (0.9)	4.9 ± 0.2 (1.0)	7.1 ± 0.3 (0.9)	0.4 ± 0.1 (0.2)	0.7 ± 0.1 (0.3)	0.6 ± 0.1 (0.3)
Non-catalytic binding sites	17	3.8 ± 0.3 (0.8)	4.2 ± 0.4 (0.8)	7.2 ± 0.4 (0.9)	0.0 ± 0.0 (0.0)	0.4 ± 0.1 (0.2)	0.4 ± 0.1 (0.2)
p-values from pairwise t-tests
		α	β	γ	O5'	α	β
O3β―Pγ-cleaving sites vs. non-catalytic binding sites		0.57732	0.03998	0.77645	0.49572	0.78322	0.00029
Pα―O3α-cleaving sites vs. non-catalytic binding sites		0.11818	0.24169	0.90786	0.06234	0.16498	0.37742
O3β―Pγ-cleaving sites vs. Pα―O3α-cleaving sites		0.14954	0.28465	0.79601	0.06621	0.00685	0.0002
C
Resolution Cutoff: 2.0Å. Interactions between waters and ligands are not included.
		Non-bridging oxygens			Bridging oxygens
Structure set	# structures	Mean number of interactions +/ Standard error (Mean/# of lone pairs)
		α	β	γ	O5'	α	β
O3β―Pγ-cleaving sites	72	2.5 ± 0.1 (0.5)	4.4 ± 0.2 (0.9)	4.8 ± 0.2 (0.6)	0.1 ± 0.1 (0.1)	0.2 ± 0.1 (0.1)	0.8 ± 0.1 (0.4)
Pα―O3α-cleaving sites	45	2.8 ± 0.2 (0.6)	3.6 ± 0.2 (0.7)	4.4 ± 0.3 (0.6)	0.1 ± 0.1 (0.1)	0.5 ± 0.1 (0.2)	0.4 ± 0.1 (0.2)
Non-catalytic binding sites	17	2.0 ± 0.2 (0.4)	3.0 ± 0.4 (0.6)	4.9 ± 0.4 (0.6)	0.0 ± 0.0 (0.0)	0.2 ± 0.1 (0.1)	0.4 ± 0.1 (0.2)
p-values from pairwise t-tests
		α	β	γ	O5'	α	β
O3β―Pγ-cleaving sites vs. non-catalytic binding sites		0.298	0.00264	0.76079	0.52104	0.74113	0.00944
Pα―O3α-cleaving sites vs. non-catalytic binding sites		0.10386	0.24573	0.30187	0.53284	0.19325	1
O3β―Pγ-cleaving sites vs. Pα―O3α-cleaving sites		0.30187	0.01814	0.29721	1	0.00944	0.00022
